# Supplementary material for: A global regulatory system links virulence and antibiotic resistance to envelope homeostasis in Acinetobacter baumannii
Source: PubMed Central journal article supplement (PMC5967708; doi:10.1371/journal.ppat.1007030), 2018-05-24

**A**

174 total plasmid genes

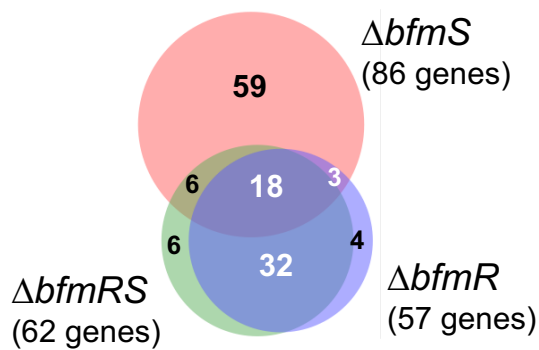**B**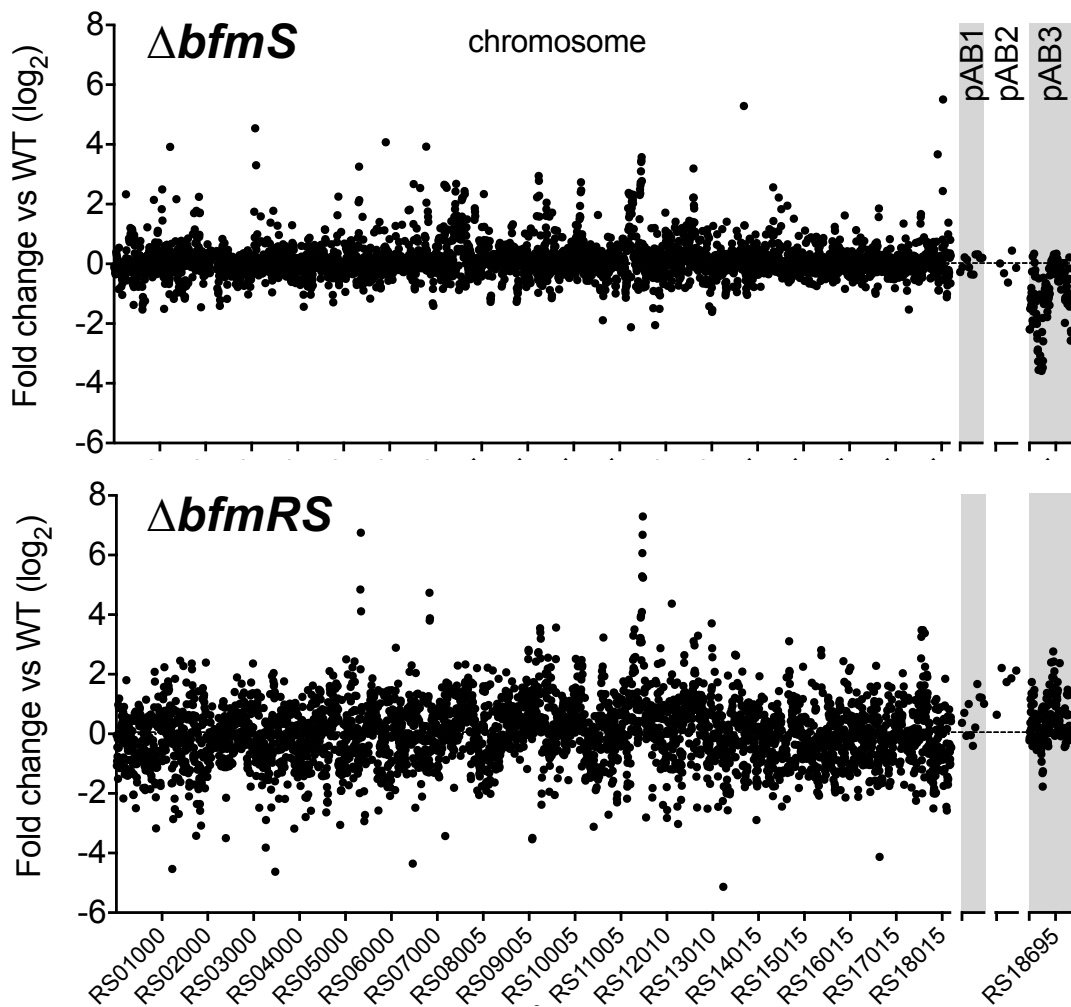

Supplement: ppat.1007030.s003.pdf [file ppat.1007030.s003.pdf]
