# Supplementary material for: A global regulatory system links virulence and antibiotic resistance to envelope homeostasis in Acinetobacter baumannii
Source: PubMed Central journal article supplement (PMC5967708; doi:10.1371/journal.ppat.1007030), 2018-05-24
Supplement: ppat.1007030.s004.pdf [file ppat.1007030.s004.pdf]

### $\Delta bfmRS$ up

phosphorelay signal transduction system  
nitrate assimilation  
DNA dealkylation involved in DNA repair  
protein-chromophore linkage

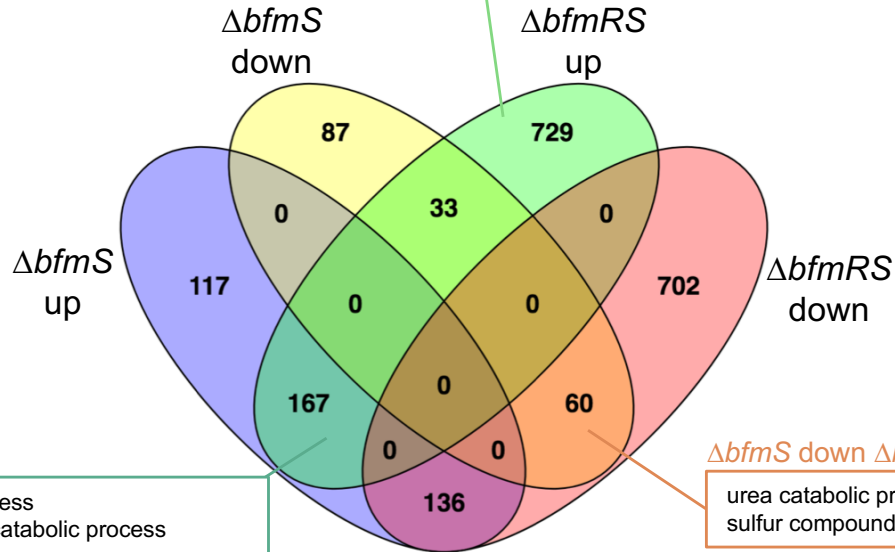

### $\Delta bfmS$ up $\Delta bfmRS$ up

phenylacetate catabolic process  
branched-chain amino acid catabolic process  
acetoin catabolic process  
fatty acid metabolic process  
fatty acid  $\beta$ -oxidation using acyl-CoA dehydrogenase  
metabolic process  
putrescine catabolic process

### $\Delta bfmS$ down $\Delta bfmRS$ down

urea catabolic process  
sulfur compound metabolic process
