# Supplementary material for: A global regulatory system links virulence and antibiotic resistance to envelope homeostasis in Acinetobacter baumannii
Source: PubMed Central journal article supplement (PMC5967708; doi:10.1371/journal.ppat.1007030), 2018-05-24
Supplement: ppat.1007030.s009.pdf [file ppat.1007030.s009.pdf]

**S1 Table. Strains and plasmids.**

| Strain or plasmid          | Genotype or description                                                                                 | Reference  |
|----------------------------|---------------------------------------------------------------------------------------------------------|------------|
| <b><i>A. baumannii</i></b> |                                                                                                         |            |
| ATCC 17978                 | cerebrospinal fluid isolate                                                                             | [1]        |
| EGA195                     | ATCC 17978 $\Delta bfmS::aacC1$ (Gm <sup>R</sup> )                                                      | [2]        |
| EGA496                     | ATCC 17978 $\Delta bfmR::aacC1$                                                                         | this study |
| EGA495                     | ATCC 17978 $\Delta bfmRS::aacC1$                                                                        | this study |
| EGA497                     | ATCC 17978 $\Delta bfmRS::aacC1::pEGE152$                                                               | this study |
| EGA501                     | ATCC 17978 $\Delta bfmRS::aacC1::pEGE224$                                                               | this study |
| EGA507                     | ATCC 17978 $\Delta bfmRS::aacC1::pEGE234$                                                               | this study |
| EGA465                     | ATCC 17978 $\Delta adeIJK$                                                                              | this study |
| EGA513                     | ATCC 17978 $\Delta adc$                                                                                 | this study |
| EGA514                     | ATCC 17978 $\Delta oxa51$                                                                               | this study |
| EGA515                     | ATCC 17978 $\Delta adc \Delta oxa51$                                                                    | this study |
| EGA516                     | ATCC 17978 $\Delta ampG$                                                                                | this study |
| EGA517                     | ATCC 17978 $\Delta ampG \Delta bfmRS::aacC1$                                                            | this study |
| EGA518                     | ATCC 17978 $\Delta ampG \Delta bfmS::aacC1$                                                             | this study |
| EGA624                     | ATCC 17978 $\Delta adc \Delta bfmS::aacC1$                                                              | this study |
| EGA534                     | ATCC 17978 $\Delta bfmRS::aacC1 cspC(G17AfsX21)$                                                        | this study |
| EGA552                     | ATCC 17978 $\Delta bfmRS::aacC1 ACX60\_RS05385$ (NUDIX):: <i>ISAb1</i>                                  | this study |
| EGA555                     | ATCC 17978 $\Delta bfmRS::aacC1 mnmA(G362S)$                                                            | this study |
| EGA692                     | ATCC 17978 $\Delta pbp2$                                                                                | this study |
| EGA694                     | ATCC 17978 $\Delta pbp2 \Delta bfmS::aacC1$                                                             | this study |
| EGA695                     | ATCC 17978 $\Delta pbp2 \Delta bfmRS::aacC1$                                                            | this study |
| EGA68                      | ATCC 17978 $\Delta KL3::aacC1$                                                                          | [2]        |
| EGA127                     | ATCC 17978 $bfmS^{1-467}$ (G467DfsX19)                                                                  | [2]        |
| EGA187                     | ATCC 17978 $bfmS^{1-467}$ (G467DfsX19) $\Delta KL3::aacC1$                                              | this study |
| ATCC 19606                 | urine isolate                                                                                           | [1]        |
| EGA216                     | ATCC 19606 $\Delta bfmS::aacC1$                                                                         | [2]        |
| AB5075-UW                  | bone isolate/osteomyelitis                                                                              | [3]        |
| AB08299                    | AB5075-UW $bfmS::T26$                                                                                   | [3]        |
| <b><i>E. coli</i></b>      |                                                                                                         |            |
| DH5 $\alpha$               | <i>supE44</i> $\Delta lacU169$ ( $\phi 80lacZ\Delta M15$ ) <i>hsdR17 recA1 endA1 gyrA96 thi-1 relA1</i> | [4]        |
| DH5 $\lambda$ pir          | DH5 $\alpha$ ( $\lambda$ pir) <i>tet::Mu recA</i>                                                       | [5]        |
| TO60                       | DH5 $\alpha$ $\lambda$ pir [F' <i>proAB lac<sup>q</sup>\Delta M15 Tn10</i> (Tc <sup>R</sup> )]          | [6]        |
| <b>plasmids</b>            |                                                                                                         |            |
| pUC18                      | <i>oriColE1</i> MCS Cb <sup>R</sup>                                                                     | [7]        |
| pSR47s                     | <i>oriTRP4 oriR6K</i> Km <sup>R</sup>                                                                   | [8]        |
| pEGE148                    | pSR47s:: <i>aacC1</i> Km <sup>R</sup> Gm <sup>R</sup>                                                   | [2]        |
| pEGE152                    | pEGE148:: <i>bfmR bfmS</i>                                                                              | [2]        |
| pEGE224                    | pEGE148:: <i>bfmR bfmS</i> (H324Q, 3XFLAG)                                                              | this study |
| pEGE234                    | pEGE148:: <i>bfmR</i> (3XFLAG)                                                                          | this study |
| pJB1801                    | <i>oriRSF1010</i> Cb <sup>R</sup>                                                                       | [2]        |
| pEGE144                    | pJB1801:: <i>bfmR bfmS</i>                                                                              | this study |

|                     |                                                                                                 |            |
|---------------------|-------------------------------------------------------------------------------------------------|------------|
| pEGE146             | pJB1801:: <i>bfmR bfmS</i> (G494V)                                                              | this study |
| pWH1266             | shuttle plasmid, Tc <sup>R</sup> Cb <sup>R</sup>                                                | [9]        |
| pFPV25              | promoter trap vector containing promoterless <i>gfpmut3</i>                                     | [10]       |
| pEGE244             | pWH1266 with <i>rrnB</i> , T7 tandem terminators replacing EcoRI-PstI fragment, Tc <sup>R</sup> | this study |
| pEGE245             | pEGE244 with SacI-PstI fragment of pFPV25                                                       | this study |
| pEGE313             | pEGE245 with <i>adcp</i> inserted upstream of <i>gfpmut3</i>                                    | this study |
| pEGE314             | pEGE245 with <i>oxa51p</i> inserted upstream of <i>gfpmut3</i>                                  | this study |
| pEGE315             | pEGE245 with <i>sltp</i> inserted upstream of <i>gfpmut3</i>                                    | this study |
| pEGE253             | pEGE245 with <i>ygeRp</i> inserted upstream of <i>gfpmut3</i>                                   | this study |
| pEGE254             | pEGE245 with <i>tolBp</i> inserted upstream of <i>gfpmut3</i>                                   | this study |
| pEGE246             | pEGE245 with <i>ACX60_RS18040p</i> inserted upstream of <i>gfpmut3</i>                          | this study |
| pEGE247             | pEGE245 with <i>ompW(ACX60_RS05905)p</i> inserted upstream of <i>gfpmut3</i>                    | this study |
| pEGE248             | pEGE245 with <i>ACX60_RS13710p</i> inserted upstream of <i>gfpmut3</i>                          | this study |
| pEGE251             | pEGE245 with <i>ACX60_RS09685p</i> inserted upstream of <i>gfpmut3</i>                          | this study |
| pEGE304             | pWH1266 with EcoRI-PstI fragment replaced by polylinker, Tc <sup>R</sup>                        | this study |
| pCA24N- <i>dinB</i> | Source of <i>lacI<sup>q</sup></i> , T5- <i>lacp</i> fragment                                    | [11, 12]   |
| pEGE305             | pEGE304 with <i>lacI<sup>q</sup></i> , T5- <i>lacp</i> fragment, Tc <sup>R</sup>                | this study |
| pEGE316             | pEGE305 with <i>slt</i> gene downstream of T5- <i>lacp</i> promoter                             | this study |

### References

1. Bouvet P, Grimont P. Taxonomy of the Genus *Acinetobacter* with the Recognition of *Acinetobacter baumannii* sp. nov. *Acinetobacter haemolyticus* sp. nov. *Acinetobacter johnsonii* sp. nov. and *Acinetobacter junii* sp. nov. and Emended Descriptions of *Acinetobacter calcoaceticus* and *Acinetobacter lwoffii*. *International Journal of Systematic Bacteriology*. 1986;36(2):228-40.
2. Geisinger E, Isberg RR. Antibiotic modulation of capsular exopolysaccharide and virulence in *Acinetobacter baumannii*. *PLoS Pathog*. 2015;11(2):e1004691. Epub 2015/02/14. doi: 10.1371/journal.ppat.1004691 PMID: 25679516.
3. Gallagher LA, Ramage E, Weiss EJ, Radey M, Hayden HS, Held KG, et al. Resources for Genetic and Genomic Analysis of Emerging Pathogen *Acinetobacter baumannii*. *J Bacteriol*. 2015;197(12):2027-35. doi: 10.1128/JB.00131-15. PMID: 25845845.
4. Hanahan D, Jessee J, Bloom FR. Plasmid transformation of *Escherichia coli* and other bacteria. *Methods Enzymol*. 1991;204:63-113. Epub 1991/01/01. doi: 0076-6879(91)04006-A [pii]. PMID: 1943786.
5. Kolter R, Inuzuka M, Helinski DR. Trans-complementation-dependent replication of a low molecular weight origin fragment from plasmid R6K. *Cell*. 1978;15(4):1199-208. Epub 1978/12/01. doi: 0092-8674(78)90046-6 [pii]. PMID: 728998.
6. O'Connor TJ, Adepoju Y, Boyd D, Isberg RR. Minimization of the *Legionella pneumophila* genome reveals chromosomal regions involved in host range expansion. *Proc Natl Acad Sci U S A*. 2011;108(36):14733-40. PMID: 21873199.
7. Yanisch-Perron C, Vieira J, Messing J. Improved M13 phage cloning vectors and host strains: nucleotide sequences of the M13mp18 and pUC19 vectors. *Gene*. 1985;33(1):103-19. Epub 1985/01/01. PMID: 2985470.
8. Andrews HL, Vogel JP, Isberg RR. Identification of linked *Legionella pneumophila* genes essential for intracellular growth and evasion of the endocytic pathway. *Infect Immun*. 1998;66(3):950-8. PMID: 9488381.
9. Hunger M, Schmucker R, Kishan V, Hillen W. Analysis and nucleotide sequence of an origin of DNA replication in *Acinetobacter calcoaceticus* and its use for *Escherichia coli* shuttle plasmids. *Gene*. 1990;87(1):45-51. PMID: 2185139.
10. Valdivia RH, Falkow S. Bacterial genetics by flow cytometry: rapid isolation of *Salmonella typhimurium* acid-inducible promoters by differential fluorescence induction. *Mol Microbiol*. 1996;22(2):367-78. PMID: 8930920.
11. Kitagawa M, Ara T, Arifuzzaman M, Ioka-Nakamichi T, Inamoto E, Toyonaga H, et al. Complete set of ORF clones of *Escherichia coli* ASKA library (a complete set of *E. coli* K-12 ORF archive): unique resources for biological research. *DNA Res*. 2005;12(5):291-9. Epub 2006/06/14. doi: 10.1093/dnares/dsi012. PMID: 16769691.
12. Macquire AE, Ching MC, Diamond BH, Kazakov A, Novichkov P, Godoy VG. Activation of phenotypic subpopulations in response to ciprofloxacin treatment in *Acinetobacter baumannii*. *Mol Microbiol*. 2014;92(1):138-52. Epub 2014/03/13. doi: 10.1111/mmi.12541. PMID: 24612352.
