# Supplementary material for: A global regulatory system links virulence and antibiotic resistance to envelope homeostasis in Acinetobacter baumannii
Source: PubMed Central journal article supplement (PMC5967708; doi:10.1371/journal.ppat.1007030), 2018-05-24
Supplement: ppat.1007030.s010.pdf [file ppat.1007030.s010.pdf]

S2 Table. Oligonucleotide primers

| primer name    | Sequence (5' – 3'; restriction site underlined, with partial sites in italics)                                                                                                                | RE site(s)                 |
|----------------|-----------------------------------------------------------------------------------------------------------------------------------------------------------------------------------------------|----------------------------|
| <i>cloning</i> |                                                                                                                                                                                               |                            |
| H234Q-F        | <u>AGAACTCAGAACACCTGTGGCACG</u>                                                                                                                                                               | SmlI                       |
| H234Q-R        | <u>TGAGATACTGCTCTCATTAACTCACGTTG</u>                                                                                                                                                          | SmlI                       |
| bfmS-Rkpn      | <u>CTGAGGTACCGCAAACCTATTTTGGAACCTGATG</u>                                                                                                                                                     | KpnI                       |
| 3xFLAGtop      | <u>GGGATCCGTCGACTCTAGAGGCGGTGACTACAAAGACCATGACGGTGATTAT</u><br><u>AAAGATCATGATATTGACTACAAAGATGACGACGATAAATAGTAAGGTAC</u>                                                                      | PstI, BamHI,<br>XbaI, KpnI |
| 3xFLAGbottom   | <u>CTTACTATTTATCGTCGTCATCTTTGTAGTCAATATCATGATCTTTATAATCACCGT</u><br><u>CATGGTCTTTGTAGTCACCGCCTCTAGAGTCGACGGATCCCTGCA</u>                                                                      | PstI, BamHI,<br>XbaI, KpnI |
| bfmR-3FLAG-F   | <u>TGATATTGACTACAAAGATGACGACGATAAATAAAATCTGATTAACTTCCTATAA</u><br><u>GGTTGG</u>                                                                                                               | BspHI                      |
| bfmR-3FLAG-R   | <u>TGATCTTTATAATCACCGTCATGGTCTTTGTAGTCACCGCCCAATCCATTGGTTTC</u><br><u>TTTAACAAACAAGTAAC</u>                                                                                                   | BspHI                      |
| DadelJK-upR3   | <u>AAAGGAGCTCCGACATCATTGTTCCACCTCG</u>                                                                                                                                                        | Sac                        |
| DadelJK-upF3   | <u>TAGAGGATCCTCACATTGCCTTTGCGTCAGC</u>                                                                                                                                                        | BamHI                      |
| DadelJK-dwnF   | <u>GGTAGAGCTCCCATCTAGTGCTGAACCTTAAAAAGCAATAAG</u>                                                                                                                                             | SacI                       |
| DadelJK-dwnR2  | <u>AGCAGTCGACTTATTCGGATTGAACAAGACCAAGC</u>                                                                                                                                                    | Sall                       |
| Dadc-upR       | <u>CTAAAGGTACCAAGCGGGGATAAAAGTAGACAAG</u>                                                                                                                                                     | KpnI                       |
| Dadc-upF       | <u>GCTGGGATCCACGGAAAAAGAAGGTGATTGG</u>                                                                                                                                                        | BamHI                      |
| Dadc-dwnF      | <u>GCATTGGTACCGCTTATGCTGTGCTGAATGC</u>                                                                                                                                                        | KpnI                       |
| Dadc-dwnR3     | <u>CAAGGGTCGACCAAAGCTCCTGTGTATCGAC</u>                                                                                                                                                        | Sall                       |
| Doxa51-upR     | <u>CGCTGGTACCAAGTAAGAGTGCTTTAATGTTTCATAAGAC</u>                                                                                                                                               | KpnI                       |
| Doxa51-upF     | <u>GGTGGGATCCGTGAAAGAGCCAATAGAAGC</u>                                                                                                                                                         | BamHI                      |
| Doxa51-dwnF    | <u>ATTAGGTACCTTATAGAGTTAGTTTATAGCCCAGTTCAC</u>                                                                                                                                                | KpnI                       |
| Doxa51-dwnR    | <u>GAGAGTCGACTCCTACGGCAGTTGTTCTTG</u>                                                                                                                                                         | Sall                       |
| pbp2-upF       | <u>ATCAGGATCCATTTGGCTCACCACCATTTAC</u>                                                                                                                                                        | BamHI                      |
| pbp2-upR       | <u>TTTAAGGTACCGTGCTGTTTCATACGGATCGAC</u>                                                                                                                                                      | KpnI                       |
| pbp2-dwnF      | <u>CTCCAGGTACCACACCAACTCGTCCTGCTACAAAC</u>                                                                                                                                                    | KpnI                       |
| pbp2-dwnR      | <u>ATTCAGTCGACTGAGAAGCAAGGGCTGTTAAGG</u>                                                                                                                                                      | Sall                       |
| DampG-up-R     | <u>AGACGGTACCAGAGGTTTGTGTGGTCATTCCG</u>                                                                                                                                                       | KpnI                       |
| DampG-up-F     | <u>TTTAAGGATCCTTCAAGGCCTTTCACCTTGC</u>                                                                                                                                                        | BamHI                      |
| DampG-dwn-F    | <u>AGATGGTACCACACATGACATAGAAAAGGCAGG</u>                                                                                                                                                      | KpnI                       |
| DampG-dwn-R    | <u>AAGGGTCGACAACCTCACCTGATGCCAAAGC</u>                                                                                                                                                        | Sall                       |
| rrnBT7TT       | <u>GATCATGAATTCAGGCATCAAATAAAACGAAAGGCTCAGTCGAAAGACTGGGC</u><br><u>CTTTGTTTTATCTGTTGTTTGTGCGTGAACGCTCTCTACTAGAGTCACACTGGCT</u><br><u>CACCTTCGGGTGGGCCTTTCTGCGTTTATAGAGCTCATACCTGCAGAGTCAT</u> | EcoRI, SacI,<br>PstI       |
| slt-F          | <u>CCTAAAGAATTCTAGTCAGGATTTAACGCATTTATGAGACC</u>                                                                                                                                              | EcoRI                      |
| slt-R          | <u>TTATGCCTGCAGAAAGAATGTTCCATCATTTCATCATCTAAAAC</u>                                                                                                                                           | PstI                       |
| adc-F          | <u>CATCATGAGCTCCCATTCTATGGCCGTGTTCC</u>                                                                                                                                                       | SacI                       |
| adc-R          | <u>TAAATCTCTAGATTAGCTCATAAATTATTTAAAAAGAAAGATGCCTAC</u>                                                                                                                                       | XbaI                       |
| oxa-F          | <u>TAAAACGAGCTCTATCTCAAAAAGAAAATTCATTGCAG</u>                                                                                                                                                 | SacI                       |
| oxa-R          | <u>TTAATGCTCTAGAAGACTTATAAAATTGAATTTGAAGTTTAGC</u>                                                                                                                                            | XbaI                       |
| sltp-F         | <u>TAAAATGAGCTCAAACGGGTCAAACCAATCATTATAGCAG</u>                                                                                                                                               | SacI                       |
| sltp-R         | <u>TCTTGTCTCTAGAAGCTCTTTTACCTGGTCTCATAAATGC</u>                                                                                                                                               | XbaI                       |
| ygeRp-F        | <u>CTTACCGAGCTCGCCGTGCCCAATCTAAAC</u>                                                                                                                                                         | SacI                       |
| ygeRp-R        | <u>CAGTTATCTAGATCGATCTCCCTCACTAAATGCTAC</u>                                                                                                                                                   | XbaI                       |
| tolBp-F        | <u>CTAAAAGAGCTCAAGAAGAAGCTGCCCAGA</u>                                                                                                                                                         | SacI                       |
| tolBp-R        | <u>CTCGTTTCTAGAGGTTTAAAGTCATTGAAGGTATTTTTGT</u>                                                                                                                                               | XbaI                       |
| RS09685p-F     | <u>CTGTGGGAGCTCTGGGGTTGTGGTCTTAGGTG</u>                                                                                                                                                       | SacI                       |

|             |                                        |      |
|-------------|----------------------------------------|------|
| RS09685p-R  | CATTTTTCTAGATTCTCCCTAGCCCAAATGTTACTC   | XbaI |
| lipo1804pSF | AGCTTAGAGCTCGGCGCTAAAGTGG              | SacI |
| lipo1804pXR | AATTTTTCTAGATAGCTTTCCCTTTCATTACGACAAAC | XbaI |
| ompW05pSF   | GGCAAAGAGCTCTGCTTGGTGACAAATGGACAG      | SacI |
| ompW05p-XR  | CTTTTTCTCTAGAAAAGGACTCCATGTCCGAGC      | XbaI |
| gp1371pSF   | CAATCAGGAGCTCAAGCGGCTCAAATCAACAAG      | SacI |
| gp1371pXR   | TAGCTATCTAGATTTTATGGCATCCTTAAATTCATTA  | XbaI |

| <b>qRT-PCR</b> |                         |  |
|----------------|-------------------------|--|
| ftsZ-qF1       | CCAGGTAGCAGCAGAAGAAA    |  |
| ftsZ-qR1       | TACCTGTACCACCACCCATA    |  |
| LT_17-qF1      | AACTTGTGCTGGTAACTTGTATG |  |
| LT_17-qR1      | CTGTCGCTTTGAACCAACTATC  |  |
| ygeR-qF2       | GGTCCGTTTCAGGTGATACTTTA |  |
| ygeR-qR2       | GCGGTGCAATACCATTCATC    |  |
| pbp3-qF2       | AGATAAGCGAACAAAGCAAACA  |  |
| pbp3-qR2       | CCGCCCAGAGCAGATAAA      |  |
| slt70-qF1      | CACTAGGCCGTTTAGCAAATAAT |  |
| slt70-qR1      | GGCTACGGTTCGATAGAGATAC  |  |
| tolB-qF1       | ATGGGCAAATGGTGGTTTATG   |  |
| tolB-qR1       | ACCTTGCTCACTCGGTAAAT    |  |
| tolQ-qF3       | GATCAGGGTAGTCTGGAATATGG |  |
| tolQ-qR3       | AACAGCAGCCAAACCAATAAA   |  |
| adc-qF1        | GTATGGCTGTGGGTGTTATTC   |  |
| adc-qR1        | TACTGACAGAACCTAGCTCAAA  |  |
| oxa51-qF1      | GTGAAGCGTGTGGTTATGG     |  |
| oxa51-qR1      | GCCTCTTGCTGAGGAGTAAT    |  |
| uppP-qF1       | AGTGATCCAGTTAGGTGCTATT  |  |
| uppP-qR1       | TGACTCGACATCACCCTAAA    |  |
| uppS-qF1       | GCTATGGTGGTATGTGGGATA   |  |
| uppS-qR1       | AGCTGGCAGATCGTTTAGA     |  |
| ybjG-qF1       | GGTGTGCATTTCCCTTTAGAC   |  |
| ybjG-qR1       | ACCGTAAGCATTCCAGAAGTA   |  |
| lolA-qF1       | CAGTGCTTGCTCCTGTAATG    |  |
| lolA-qR1       | GTATTCGCTTTCGTTGTCTGT   |  |
| 16S_qF         | CAGCTCGTGTCGTGAGATGT    |  |
| 16S_qR         | CGTAAGGGCCATGATGACTT    |  |
| rpoC-qF4       | CAAACGGTGAGCCAATCATC    |  |
| rpoC-qR4       | GCCTTCACCTTTCGCATTT     |  |
