# Supplementary material for: A global regulatory system links virulence and antibiotic resistance to envelope homeostasis in Acinetobacter baumannii
Source: PubMed Central journal article supplement (PMC5967708; doi:10.1371/journal.ppat.1007030), 2018-05-24
Supplement: ppat.1007030.s011.pdf [file ppat.1007030.s011.pdf]

**S3 Table.** Minimal Inhibitory Concentrations ( $\mu\text{g/ml}$ ) determined from colony formation efficiency assays testing *bfmRS* mutants.

|                 | <b>WT</b> | <b><math>\Delta bfmS</math></b> | <b><math>\Delta bfmR</math></b> | <b><math>\Delta bfmRS</math></b> | <b><math>\Delta bfmRS/bfmRS^+</math></b> |
|-----------------|-----------|---------------------------------|---------------------------------|----------------------------------|------------------------------------------|
| vancomycin      | 500       | 500                             |                                 | 500                              | 500                                      |
| rifampicin      | 4         | 4                               |                                 | 1                                | 4                                        |
| erythromycin    | 16        | 16                              | 4                               | 4                                | 16                                       |
| colistin        | 1         | 1                               | 0.5                             | 0.5                              | 1                                        |
| ciprofloxacin   | 0.5       | 0.5                             | 0.125                           | 0.125                            | 0.5                                      |
| tobramycin      | 2         | 2                               | 0.5                             | 0.5                              | 2                                        |
| amikacin        | 4         | 8                               | 2                               | 2                                | 4                                        |
| chloramphenicol | 128       | 64                              | 128                             | 128                              | 128                                      |
| phosphomycin    | 125       | 125                             |                                 | 250                              |                                          |
| A22             | 64        | 64                              |                                 | 64                               | 64                                       |
| mecillinam      | 64        | 256                             |                                 | 2                                | 64                                       |
| imipenem        | 0.4       | 0.4                             | 0.025                           | 0.025                            | 0.4                                      |
| ampicillin      | 64        | 128                             |                                 | 8                                |                                          |
| carbenicillin   | 16        | 32                              |                                 | 4                                | 16                                       |
| cefoxitin       | 64        | 64                              |                                 | 8                                |                                          |
| cephalexin      | 400       | >400                            |                                 | 50                               | 400                                      |
| aztreonam       | 16        | 64                              |                                 | 4                                |                                          |
| ceftazidime     | 4         | 16                              |                                 | 1                                |                                          |
| sulbactam       | 0.5       | 2                               |                                 | 0.5                              |                                          |
