# Supplementary material for: A global regulatory system links virulence and antibiotic resistance to envelope homeostasis in Acinetobacter baumannii
Source: PubMed Central journal article supplement (PMC5967708; doi:10.1371/journal.ppat.1007030), 2018-05-24
Supplement: ppat.1007030.s012.pdf [file ppat.1007030.s012.pdf]

**S4 Table.** Minimal Inhibitory Concentrations ( $\mu\text{g/ml}$ ) determined from colony formation efficiency assays testing  $\beta$ -lactamase mutants.

|               | WT  | $\Delta\text{adc}$ | $\Delta\text{oxa51}$ | $\Delta\text{adc}\Delta\text{oxa51}$ |
|---------------|-----|--------------------|----------------------|--------------------------------------|
| mecillinam    | 64  | 16                 | 64                   | 16                                   |
| imipenem      | 0.4 | 0.4                | 0.4                  | 0.4                                  |
| ampicillin    | 64  | 16                 | 64                   | 16                                   |
| carbenicillin | 8   | 8                  | 8                    | 8                                    |
| cephalexin    | 400 | 100                | 400                  | 100                                  |
| aztreonam     | 16  | 16                 | 16                   | 8                                    |
| ceftazidime   | 4   | 4                  | 4                    | 4                                    |
| sulbactam     | 0.5 | 0.5                | 0.5                  | 0.5                                  |
