# Supplementary material for: A global regulatory system links virulence and antibiotic resistance to envelope homeostasis in Acinetobacter baumannii
Source: PubMed Central journal article supplement (PMC5967708; doi:10.1371/journal.ppat.1007030), 2018-05-24
Supplement: ppat.1007030.s013.pdf [file ppat.1007030.s013.pdf]

**S5 Table.** Derivatives of  $\Delta bfmRS$  containing mutations allowing suppression of antibiotic hypersensitivity.

| Strain name                  | antibiotic used for isolation ( $\mu\text{g/ml}$ ) <sup>a</sup> | mutation          | position  | annotation <sup>b</sup>  | locus ID                                       | protein ID     | gene        | description                           |
|------------------------------|-----------------------------------------------------------------|-------------------|-----------|--------------------------|------------------------------------------------|----------------|-------------|---------------------------------------|
| <b>Regulators</b>            |                                                                 |                   |           |                          |                                                |                |             |                                       |
| EGA534                       | IPM 0.025                                                       | $\Delta 1$ bp     | 1,349,273 | coding (45/213 nt)       | <i>ACX60_RS06250</i> →                         | WP_000126912.1 | <i>cspC</i> | cold-shock protein                    |
| EGA590                       | IPM 0.05                                                        | C→T               | 1,349,412 | <b>Q62*</b> (CAA→TAA)    | <i>ACX60_RS06250</i> →                         | WP_000126912.1 | <i>cspC</i> | cold-shock protein                    |
| EGA587                       | IPM 0.05                                                        | ISAbA11 insertion |           | intergenic (-256/-119)   | <i>ACX60_RS06245</i> /<br><i>ACX60_RS06250</i> | WP_000126912.1 | <i>cspC</i> | oxidoreductase / cold-shock protein   |
| EGA610                       | IPM 0.05                                                        | $\Delta 1$ bp     | 2,069,424 | coding (184/273 nt)      | <i>ACX60_RS09765</i> ←                         | WP_001043034.1 | <i>hupB</i> | DNA-binding protein HU-beta           |
| EGA610 (2nd mutation)        | IPM 0.05                                                        | $\Delta 95$ bp    | 1,412,371 | coding (411-505/1203 nt) | <i>ACX60_RS06590</i> ←                         | WP_005135012.1 |             | MFS transporter                       |
| EGA636                       | MEC 8                                                           | $\Delta 9$ bp     | 813,574   | coding (22-30/288 nt)    | <i>ACX60_RS03925</i> ←                         | WP_000887099.1 |             | YbeD/DUF493 domain-containing protein |
| <b>Nucleotide hydrolysis</b> |                                                                 |                   |           |                          |                                                |                |             |                                       |
| EGA552                       | MEC 8                                                           | ISAbA11 insertion |           | coding (278/489 nt)      | <i>ACX60_RS05385</i>                           | WP_000741966.1 |             | NUDIX hydrolase                       |
| <b>tRNA synthesis</b>        |                                                                 |                   |           |                          |                                                |                |             |                                       |
| EGA652                       | MEC 8                                                           | C→A               | 1,509,411 | <b>P57T</b> (CCG→ACG)    | <i>ACX60_RS07030</i> →                         | WP_000803938.1 | <i>glnS</i> | glutamine--tRNA ligase                |
| EGA659                       | MEC 8                                                           | G→A               | 1,509,516 | <b>D92N</b> (GAT→AAT)    | <i>ACX60_RS07030</i> →                         | WP_000803938.1 | <i>glnS</i> | glutamine--tRNA ligase                |
| EGA540                       | MEC 8                                                           | C→T               | 1,509,526 | <b>P95L</b> (CCG→CTG)    | <i>ACX60_RS07030</i> →                         | WP_000803938.1 | <i>glnS</i> | glutamine--tRNA ligase                |
| EGA549                       | MEC 8                                                           | C→A               | 1,509,526 | <b>P95Q</b> (CCG→CAG)    | <i>ACX60_RS07030</i> →                         | WP_000803938.1 | <i>glnS</i> | glutamine--tRNA ligase                |
| EGA546                       | MEC 8                                                           | C→T               | 1,509,714 | <b>R158C</b> (CGT→TGT)   | <i>ACX60_RS07030</i> →                         | WP_000803938.1 | <i>glnS</i> | glutamine--tRNA ligase                |
| EGA668                       | MEC 8                                                           | A→C               | 1,510,018 | <b>Q259P</b> (CAA→CCA)   | <i>ACX60_RS07030</i> →                         | WP_000803938.1 | <i>glnS</i> | glutamine--tRNA ligase                |
| EGA543                       | MEC 8                                                           | C→T               | 1,510,093 | <b>S284F</b> (TCT→TTT)   | <i>ACX60_RS07030</i> →                         | WP_000803938.1 | <i>glnS</i> | glutamine--tRNA ligase                |
| EGA600                       | IPM 0.05                                                        | C→T               | 2,816,359 | <b>G423D</b> (GGC→GAC)   | <i>ACX60_RS13385</i> ←                         | WP_002017216.1 | <i>lysS</i> | lysine--tRNA ligase                   |
| EGA641                       | MEC 8                                                           | A→G               | 2,816,837 | <b>F264L</b> (TTC→CTC)   | <i>ACX60_RS13385</i> ←                         | WP_002017216.1 | <i>lysS</i> | lysine--tRNA ligase                   |
| EGA642                       | MEC 8                                                           | +C                | 3,051,007 | coding (1604/2064 nt)    | <i>ACX60_RS14470</i>                           | WP_001226779.1 | <i>metG</i> | methionine--tRNA ligase               |
| EGA575                       | IPM 0.175                                                       | G→A               | 3,544,293 | noncoding (61/76 nt)     | <i>ACX60_RS16715</i> ←                         |                |             | tRNA-Thr                              |
| EGA562                       | IPM 0.175                                                       | G→A               | 3,544,298 | noncoding (56/76 nt)     | <i>ACX60_RS16715</i> ←                         |                |             | tRNA-Thr                              |
| EGA574                       | IPM 0.175                                                       | G→A               | 3,544,305 | noncoding (49/76 nt)     | <i>ACX60_RS16715</i> ←                         |                |             | tRNA-Thr                              |
| EGA583                       | IPM 0.175                                                       | C→T               | 3,544,308 | noncoding (46/76 nt)     | <i>ACX60_RS16715</i> ←                         |                |             | tRNA-Thr                              |
| EGA579                       | IPM 0.175                                                       | T→C               | 3,544,331 | noncoding (23/76 nt)     | <i>ACX60_RS16715</i> ←                         |                |             | tRNA-Thr                              |
| EGA576                       | IPM 0.175                                                       | T→C               | 3,544,333 | noncoding (21/76 nt)     | <i>ACX60_RS16715</i> ←                         |                |             | tRNA-Thr                              |
| EGA578                       | IPM 0.175                                                       | G→A               | 3,544,343 | noncoding (11/76 nt)     | <i>ACX60_RS16715</i> ←                         |                |             | tRNA-Thr                              |
| <b>tRNA modification</b>     |                                                                 |                   |           |                          |                                                |                |             |                                       |
| EGA555                       | MEC 8                                                           | C→T               | 1,148,445 | <b>G362S</b> (GGC→AGC)   | <i>ACX60_RS05380</i>                           | WP_001187604.1 | <i>mnmA</i> | tRNA 2-thiouridine(34) synthase       |
| EGA646                       | MEC 8                                                           | +A                | 1,148,726 | coding (803/1134 nt)     | <i>ACX60_RS05380</i>                           | WP_001187604.1 | <i>mnmA</i> | tRNA 2-thiouridine(34) synthase       |
| EGA556                       | MEC 8                                                           | $\Delta 15$ bp    | 1,148,779 | coding (736-750/1134 nt) | <i>ACX60_RS05380</i>                           | WP_001187604.1 | <i>mnmA</i> | tRNA 2-thiouridine(34) synthase       |
| EGA637                       | MEC 8                                                           | G→A               | 1,148,796 | <b>R245C</b> (CGT→TGT)   | <i>ACX60_RS05380</i>                           | WP_001187604.1 | <i>mnmA</i> | tRNA 2-thiouridine(34) synthase       |

|                                    |           |                                         |           |                          |                                      |                                   |                    |                                                              |
|------------------------------------|-----------|-----------------------------------------|-----------|--------------------------|--------------------------------------|-----------------------------------|--------------------|--------------------------------------------------------------|
| EGA655                             | MEC 8     | T→G                                     | 1,148,942 | D196A (GAT→GCT)          | ACX60_RS05380                        | WP_001187604.1                    | <i>mnmA</i>        | tRNA 2-thiouridine(34) synthase                              |
| EGA588                             | IPM 0.05  | (T) <sub>6→7</sub>                      | 1,148,949 | coding (580/1134 nt)     | ACX60_RS05380                        | WP_001187604.1                    | <i>mnmA</i>        | tRNA 2-thiouridine(34) synthase                              |
| EGA666                             | MEC 8     | A→G                                     | 1,148,969 | L187P (CTA→CCA)          | ACX60_RS05380                        | WP_001187604.1                    | <i>mnmA</i>        | tRNA 2-thiouridine(34) synthase                              |
| EGA591                             | IPM 0.05  | T→G                                     | 1,149,248 | N94T (AAC→ACC)           | ACX60_RS05380                        | WP_001187604.1                    | <i>mnmA</i>        | tRNA 2-thiouridine(34) synthase                              |
| EGA663                             | MEC 8     | T→C                                     | 1,149,426 | K35E (AAA→GAA)           | ACX60_RS05380                        | WP_001187604.1                    | <i>mnmA</i>        | tRNA 2-thiouridine(34) synthase                              |
| EGA650                             | MEC 8     | ISAb11 insertion                        |           | coding (588 nt)          | ACX60_RS05380                        | WP_001187604.1                    | <i>mnmA</i>        | tRNA 2-thiouridine(34) synthase                              |
| EGA532                             | IPM 0.025 | (TTATCG) <sub>2</sub><br>→ <sub>3</sub> | 1,426,039 | coding (37/1881 nt)      | ACX60_RS06660                        | WP_000559185.1                    | <i>gidA / mnmG</i> | tRNA uridine-5-carboxymethylaminomethyl(34) synthesis enzyme |
| EGA635                             | MEC 8     | Δ1 bp                                   | 1,667,927 | coding (144/312 nt)      | ACX60_RS07825 ←                      | WP_001047539.1                    | <i>tusE</i>        | sulfite reductase                                            |
| EGA630                             | MEC 8     | T→A                                     | 1,667,961 | H37L (CAT→CTT)           | ACX60_RS07825 ←                      | WP_001047539.1                    | <i>tusE</i>        | sulfite reductase                                            |
| EGA592                             | IPM 0.05  | C→T                                     | 1,668,020 | W17* (TGG→TGA)           | ACX60_RS07825 ←                      | WP_001047539.1                    | <i>tusE</i>        | sulfite reductase                                            |
| EGA664                             | MEC 8     | ISAb11 insertion                        |           | coding (11 nt)           | ACX60_RS07825 ←                      | WP_001047539.1                    | <i>tusE</i>        | sulfite reductase                                            |
| EGA629                             | MEC 8     | ISAb11 insertion                        |           | coding (307nt)           | ACX60_RS07825 ←                      | WP_001047539.1                    | <i>tusE</i>        | sulfite reductase                                            |
| EGA651                             | MEC 8     | Δ1 bp                                   | 1,668,935 | coding (221/369 nt)      | ACX60_RS07840 ←                      | WP_000105719.1                    | <i>tusD</i>        | sulfurtransferase                                            |
| <b>Ribosome synthesis/activity</b> |           |                                         |           |                          |                                      |                                   |                    |                                                              |
| EGA535                             | IPM 0.175 | G→A                                     | 450,408   | A58T (GCT→ACT)           | ACX60_RS02180 →                      | WP_001141025.1                    | <i>rpsE</i>        | 30S ribosomal protein S5                                     |
| EGA536                             | IPM 0.175 | C→A                                     | 453,415   | H23Q (CAC→CAA)           | ACX60_RS02210 →                      | WP_001040166.1                    | <i>rpsK</i>        | 30S ribosomal protein S11                                    |
| EGA565                             | IPM 0.175 | A→G                                     | 445,018   | intergenic (+10/-4)      | ACX60_RS02110 → /<br>→ ACX60_RS02115 | WP_001122317.1/<br>WP_001138119.1 | <i>rplB / rpsS</i> | 50S ribosomal protein L2/30S ribosomal protein S19           |
| EGA573                             | IPM 0.175 | C→T                                     | 446,989   | Q61* (CAG→TAG)           | ACX60_RS02135 →                      | WP_000849928.1                    | <i>rpmC</i>        | 50S ribosomal protein L29                                    |
| EGA537                             | IPM 0.175 | Δ189 bp                                 | 2,002,396 | coding (368-556/1005 nt) | ACX60_RS09440 ←                      | WP_000441015.1                    | <i>prmB</i>        | ribosomal protein L3 N(5)-glutamine methyltransferase        |
| EGA561                             | IPM 0.175 | G→A                                     | 2,002,570 | Q128* (CAA→TAA)          | ACX60_RS09440 ←                      | WP_000441015.1                    | <i>prmB</i>        | ribosomal protein L3 N(5)-glutamine methyltransferase        |
| EGA571                             | IPM 0.175 | ISAb11 insertion                        |           | coding (896/1005 nt)     | ACX60_RS09440                        | WP_000441015.1                    | <i>prmB</i>        | ribosomal protein L3 N(5)-glutamine methyltransferase        |
| EGA631                             | MEC 8     | C→A                                     | 1,282,031 | intergenic (+46/-92)     | ACX60_RS05915 → /<br>→ ACX60_RS05920 | WP_001982118.1/<br>WP_000125378.1 |                    | 30S ribosomal protein S2/elongation factor Ts                |
| EGA551                             | MEC 8     | (TGC) <sub>4→3</sub>                    | 1,282,419 | coding (297-299/876 nt)  | ACX60_RS05920 →                      | WP_000125378.1                    | <i>tsf</i>         | elongation factor Ts                                         |
| EGA648                             | MEC 8     | A→T                                     | 2,961,703 | V386E (GTA→GAA)          | ACX60_RS14035                        | WP_001029610.1                    | <i>tuf</i>         | elongation factor Tu                                         |
| EGA632                             | MEC 8     | C→G                                     | 2,962,283 | A193P (GCT→CCT)          | ACX60_RS14035                        | WP_001029610.1                    | <i>tuf</i>         | elongation factor Tu                                         |
| EGA634                             | MEC 8     | G→C                                     | 2,962,740 | Y40* (TAC→TAG)           | ACX60_RS14035                        | WP_001029610.1                    | <i>tuf</i>         | elongation factor Tu                                         |
| EGA541                             | MEC 8     | Δ2 bp                                   | 2,962,760 | coding (99-100/1191 nt)  | ACX60_RS14035                        | WP_001029610.1                    | <i>tuf</i>         | elongation factor Tu                                         |
| EGA644                             | MEC 8     | G→C                                     | 2,962,771 | A30G (GCT→GGT)           | ACX60_RS14035                        | WP_001029610.1                    | <i>tuf</i>         | elongation factor Tu                                         |
| EGA550                             | MEC 8     | T→C                                     | 2,962,787 | K25E (AAA→GAA)           | ACX60_RS14035                        | WP_001029610.1                    | <i>tuf</i>         | elongation factor Tu                                         |
| EGA547                             | MEC 8     | T→C                                     | 2,962,795 | D22G (GAC→GGC)           | ACX60_RS14035                        | WP_001029610.1                    | <i>tuf</i>         | elongation factor Tu                                         |
| EGA645                             | MEC 8     | C→T                                     | 2,962,814 | G16S (GGT→AGT)           | ACX60_RS14035                        | WP_001029610.1                    | <i>tuf</i>         | elongation factor Tu                                         |
| EGA643                             | MEC 8     | A→G                                     | 2,962,858 | M1T (ATG→ACG) †          | ACX60_RS14035                        | WP_001029610.1                    | <i>tuf</i>         | elongation factor Tu                                         |
| EGA539                             | IPM 0.175 | Δ27 bp                                  | 3,481,676 | coding (607-633/2700 nt) | ACX60_RS16410 ←                      | WP_000130326.1                    | <i>infB</i>        | translation initiation factor IF-2                           |

| Peptidoglycan synthesis |           |                   |           |                          |                                      |                |              |                                                     |
|-------------------------|-----------|-------------------|-----------|--------------------------|--------------------------------------|----------------|--------------|-----------------------------------------------------|
| EGA593                  | IPM 0.05  | C→T               | 317,172   | G728S (GGT→AGT)          | ACX60_RS01520 ←                      | WP_000736677.1 | <i>pbp1A</i> | penicillin-binding protein 1A                       |
| isoprenoid synthesis    |           |                   |           |                          |                                      |                |              |                                                     |
| EGA564                  | IPM 0.175 | C→T               | 801,341   | E93K (GAA→AAA)           | ACX60_RS03850 ←                      | WP_000234078   | <i>ispB</i>  | solanesyl diphosphate synthase                      |
| EGA577                  | IPM 0.175 | +TAA              | 801,646   | intergenic (-29/+19)     | ACX60_RS03850 ← /<br>← ACX60_RS03855 | WP_000234078   | <i>ispB</i>  | solanesyl diphosphate synthase/hypothetical protein |
| Peptidase               |           |                   |           |                          |                                      |                |              |                                                     |
| EGA595                  | IPM 0.05  | ISAbA11 insertion |           | coding (22/1185 nt)      | ACX60_RS16915                        | WP_000939111.1 | <i>ctpA</i>  | peptidase S41                                       |
| EGA598                  | IPM 0.05  | Δ9 bp             | 3,143,075 | coding (527-535/1452 nt) | ACX60_RS14880 ←                      | WP_005135781.1 |              | peptidase C13 family protein                        |
| EGA603                  | IPM 0.05  | Δ2 bp             | 3,142,683 | coding (926-927/1452 nt) | ACX60_RS14880 ←                      | WP_005135781.1 |              | peptidase C13 family protein                        |
| Unknown                 |           |                   |           |                          |                                      |                |              |                                                     |
| EGA567                  | IPM 0.175 | ISAbA11 insertion |           | coding (251/300 nt)      | ACX60_RS03855                        | WP_000667115.1 |              | hypothetical protein                                |
| EGA570                  | IPM 0.175 | ISAbA11 insertion |           | coding (126/300 nt)      | ACX60_RS03855                        | WP_000667115.1 |              | hypothetical protein                                |
| EGA580                  | IPM 0.175 | Δ1 bp             | 3,008,574 | coding (138/561 nt)      | ACX60_RS14290 ←                      | WP_001275712.1 |              | hypothetical protein                                |
| EGA633                  | MEC 8     | ISAbA11 insertion |           | coding (348 nt)          | ACX60_RS06190                        | WP_000409701.1 |              |                                                     |
| EGA647                  | MEC 8     | Δ30 bp            | 1,668,450 | coding (264-293/351 nt)  | ACX60_RS07835 ←                      | WP_000859774.1 |              | hypothetical protein                                |
| EGA656                  | MEC 8     | ISAbA11 insertion |           | coding (343 nt)          | ACX60_RS07835                        | WP_000859774.1 |              | hypothetical protein                                |
| EGA658                  | MEC 8     | ISAbA11 insertion |           | coding (348 nt)          | ACX60_RS07835                        | WP_000859774.1 |              |                                                     |
| EGA667                  | MEC 8     | G→A               | 1,668,368 | Q3* (CAA→TAA)            | ACX60_RS07830 ←                      | WP_000194629.1 |              | hypothetical protein                                |

a. *ΔbfmRS* bacteria were spread on LB agar containing imipenem (IPM) or mecillinam (MEC) at the indicated concentrations, and resistant mutants were purified on LB agar.

b. Description of the mutation given in *breseq* output. From *breseq* 0.30.0 documentation: "For base substitutions inside genes, shows the resulting amino acid and codon changes. For other mutations inside genes, gives the local coordinates of the nucleotides affected. For mutations in intergenic regions, gives two relative positions (e.g., +150/-119) where the numbers are the distances from the mutation to the nearest neighboring genes before and after it in the genome, and the +/- signs indicate whether the mutation is oriented upstream or downstream with respect to each of these genes." <http://barricklab.org/twiki/pub/Lab/ToolsBacterialGenomeResequencing/documentation/index.html>
